# Supplementary figures and images for: Spatial Metagenomics of Three Geothermal Sites in Pisciarelli Hot Spring Focusing on the Biochemical Resources of the Microbial Consortia
Source: MDPI journal article supplement (doi:10.3390/molecules25174023), 2020-09-03

Figure S1

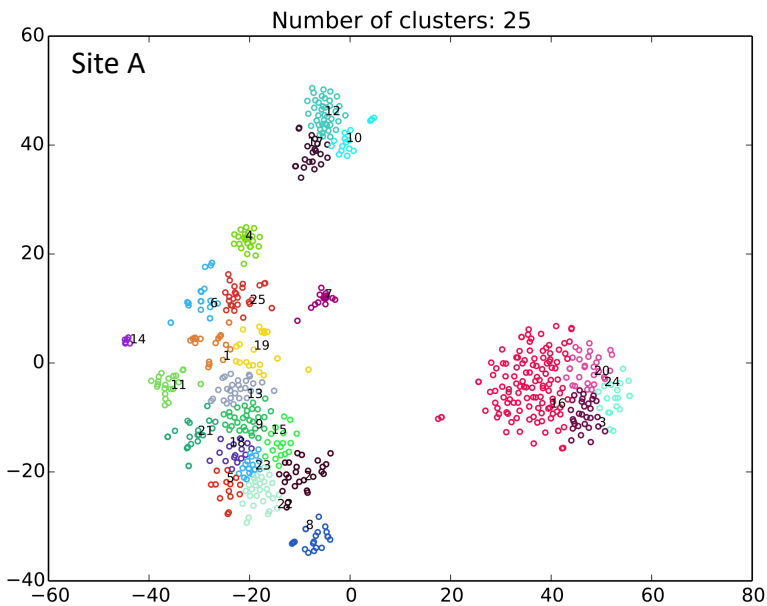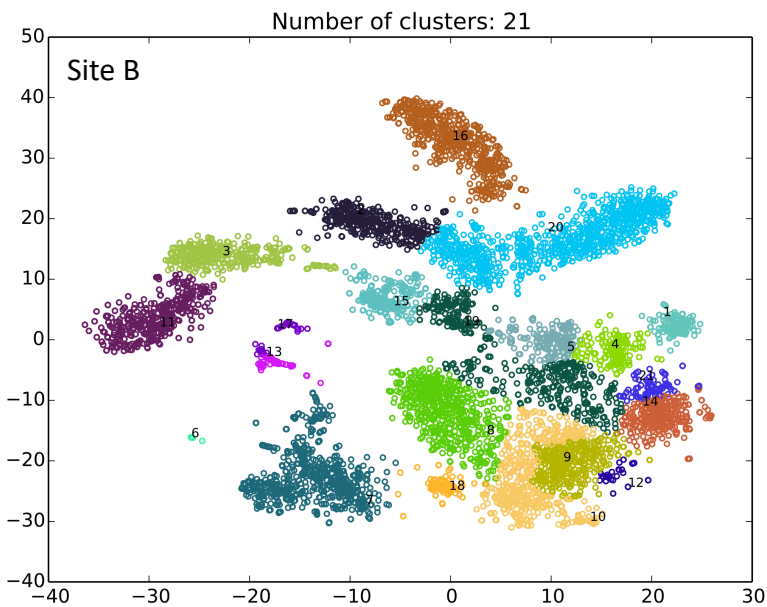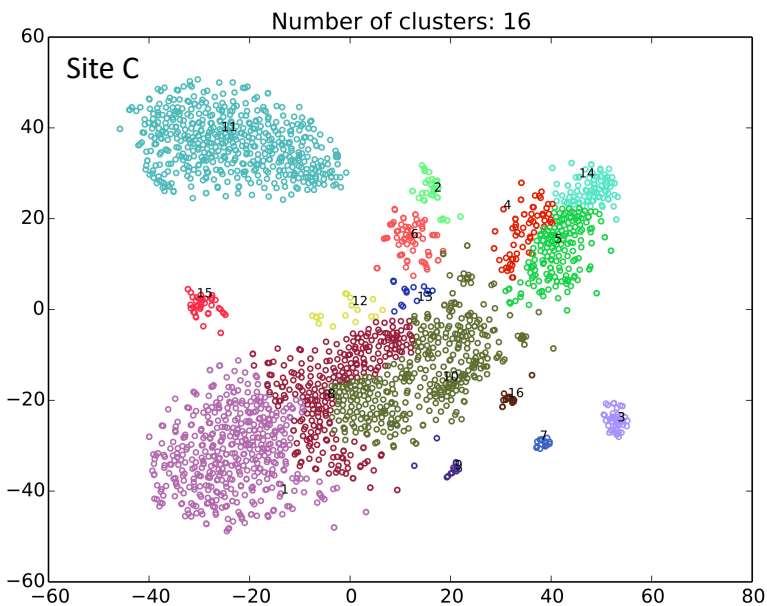

Figure S2

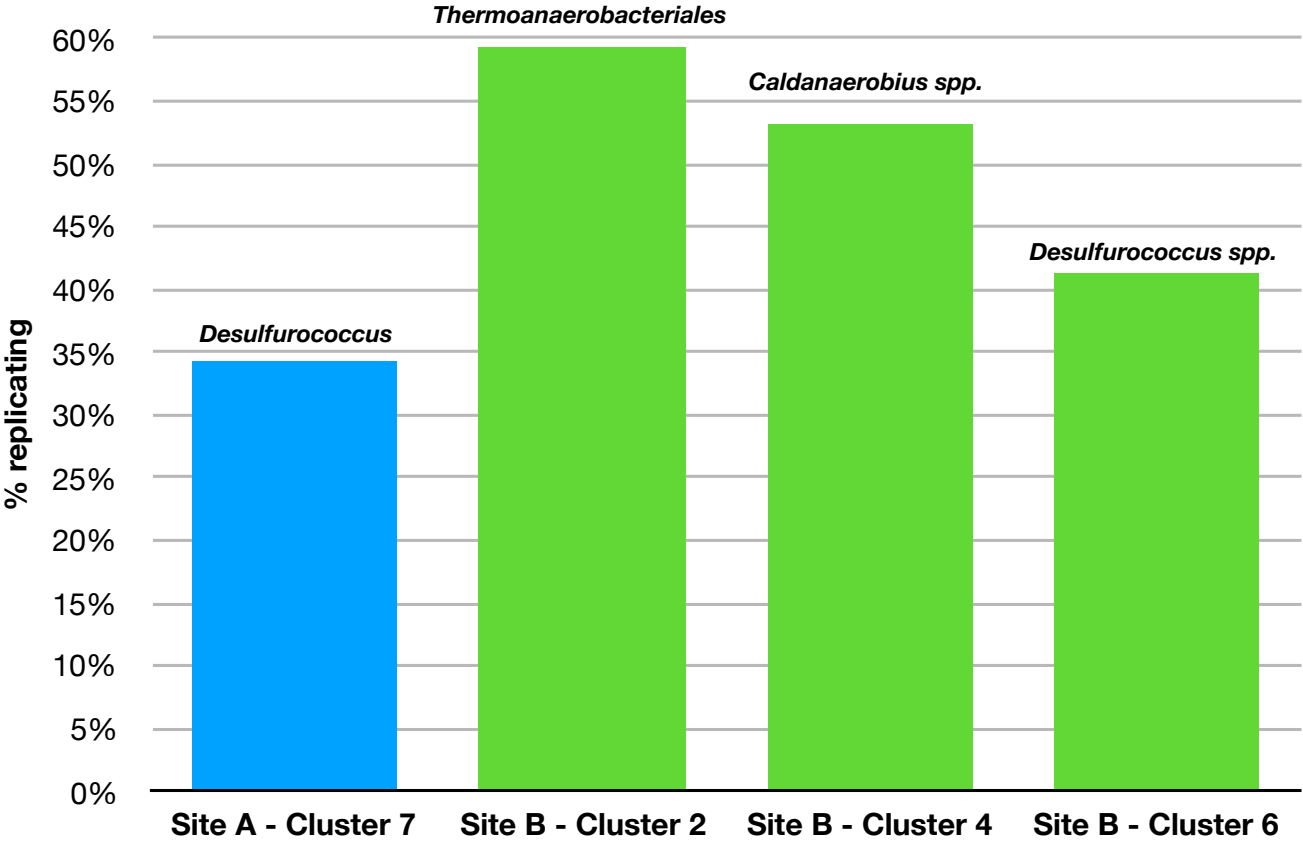

Supplement: s1 [file s1]
